# Supplementary material for: A new method to determine the aerosol optical properties from multiple wavelength O 4 absorptions by MAX-DOAS observation
Source: Copernicus journal article supplement (doi:10.5194/amt-2019-15), 2019-02-06
Supplement: Supplementary file 1 [file amt-2019-15-supplement.pdf]

*Supplementary of*

**A new method to determine the aerosol optical properties from multiple wavelength O<sub>4</sub> absorptions by MAX-DOAS observation**

**Chengzhi Xing et al.**

5 \*Correspondence to: Shanshan Wang (shanshanwang@fudan.edu.cn) and Cheng Liu (chliu81@ustc.edu.cn)

10

15

20

25

30 **Table S1. Discussion of break points based on  $\sigma_{\text{sca}}$**

| Date       | Breakpoint | $v_{sca}$ | $a_{sca}$ | $a'_{sca}$ |
|------------|------------|-----------|-----------|------------|
| 2016/11/01 | 09:00      | -113.22   | -2076.08  | -28172.69  |
|            | 12:00      | -45.88    | 841.84    | 36474.01   |
|            | 14:00      | 251.89    | 2836.27   | 31514.06   |
|            | 16:00      | -200.00   | -5648.61  | -106060.96 |
| 2016/11/02 | 10:00      | -3.25     | 2459.38   | 101349.83  |
|            | 16:00      | 5.33      | 95.37     | -26266.72  |
| 2016/11/03 | 12:00      | 11.67     | -1012.04  | -24508.74  |
|            | 14:00      | 469.75    | 5841.20   | 73018.74   |
| 2016/11/04 | 11:00      | 35.89     | -4820.68  | -118465.30 |
|            | 14:00      | -12.88    | -609.55   | 52639.13   |
|            | 16:00      | 233.25    | 3003.13   | 37469.62   |
| 2016/11/05 | 10:00      | -138.25   | -4643.75  | -95585.94  |
|            | 12:00      | 16.33     | 1717.59   | 70681.58   |
| 2016/11/06 | 10:00      | 24.50     | 102.08    | -20193.87  |
|            | 12:00      | 27.00     | -1148.61  | -30649.40  |
|            | 16:00      | -224.50   | -2718.75  | -28671.88  |
| 2016/11/07 | 09:00      | -65.33    | 1768.52   | 49858.54   |
| 2016/11/08 | 09:00      | 247.00    | 3015.63   | 26588.54   |
|            | 11:00      | 60.67     | -2070.37  | -56511.06  |
|            | 14:00      | 138.25    | 1753.13   | 21601.56   |
| 2016/11/09 | 10:00      | -124.67   | -2921.30  | -51938.01  |
| 2016/11/10 | 11:00      | -9.63     | 1438.02   | 54491.46   |
|            | 14:00      | -52.89    | 1333.18   | 22417.27   |
| 2016/11/11 | 12:00      | 166.75    | 2400.00   | 33650.17   |
|            | 14:00      | -189.33   | -3956.48  | -70627.57  |
|            | 15:00      | -34.38    | 1936.98   | 73668.26   |
| 2016/11/12 | 09:00      | -9.25     | 314.06    | -20286.46  |
|            | 12:00      | 208.75    | 2770.31   | 35963.54   |
|            | 14:00      | -192.67   | -4460.19  | -80338.86  |
| 2016/11/13 | 09:00      | -15.25    | 2217.71   | 83473.67   |
|            | 10:00      | -10.00    | 65.63     | -26901.04  |
| 2016/11/14 | 09:00      | 338.38    | 4449.13   | 64797.21   |
|            | 13:00      | -31.25    | -4620.31  | -113368.06 |
|            | 15:00      | 9.11      | 448.46    | 56319.66   |
| 2016/11/15 | 10:00      | -944.22   | -10617.75 | -118634.69 |
|            | 12:00      | 1064.38   | 25107.47  | 446565.15  |
|            | 15:00      | -6.88     | -13390.63 | -481226.13 |
| 2016/11/16 | 11:00      | -6.22     | 7.25      | 148865.31  |
|            | 13:00      | -139.89   | -2458.49  | -38427.64  |
| 2016/11/17 | 13:00      | -109.38   | 381.42    | 35498.89   |
|            | 14:00      | 15.56     | 2127.01   | 32869.51   |
| 2016/11/18 | 10:00      | 53.75     | 477.43    | -20619.70  |
| 2016/11/19 | 10:00      | -121.50   | -3965.97  | -72686.15  |

|            |       |         |          |            |
|------------|-------|---------|----------|------------|
|            | 12:00 | -69.00  | 687.50   | 20243.06   |
|            | 13:00 | -149.25 | -2110.94 | -40234.38  |
|            | 15:00 | -141.78 | 83.02    | 24377.36   |
| 2016/11/20 | 09:00 | -4.50   | 1300.00  | 26883.68   |
| 2016/11/21 | 09:00 | 28.00   | -1298.61 | -25331.79  |
|            | 11:00 | -17.67  | 1073.15  | 20691.23   |
|            | 12:00 | -22.13  | 1034.55  | 24235.87   |
| 2016/11/23 | 10:00 | 157.50  | 1959.38  | 23697.92   |
|            | 12:00 | 60.56   | -1077.16 | -33739.28  |
|            | 15:00 | 39.50   | 1345.14  | 25406.06   |
|            | 16:00 | 18.13   | -267.19  | -20154.08  |
| 2016/11/24 | 09:00 | 31.38   | -1387.50 | -33513.45  |
| 2016/11/25 | 10:00 | 244.38  | 2992.19  | 33999.57   |
|            | 12:00 | 5.78    | -2651.08 | -62702.97  |
|            | 13:00 | 7.25    | 18.40    | 33368.54   |
|            | 15:00 | 84.56   | 3935.34  | 70635.72   |
| 2016/11/26 | 12:00 | -23.25  | -1347.57 | -66036.36  |
|            | 14:00 | -170.50 | -2007.81 | -24943.58  |
| 2016/11/27 | 10:00 | -6.22   | 1825.31  | 42590.23   |
|            | 12:00 | -23.00  | 788.89   | 20918.21   |
|            | 16:00 | -37.33  | 728.24   | 21754.76   |
| 2016/12/05 | 09:00 | -53.25  | -4481.25 | -84058.16  |
|            | 11:00 | -57.44  | -46.60   | 49273.83   |
|            | 13:00 | 188.63  | 2240.63  | 28174.91   |
| 2016/12/06 | 10:00 | 35.67   | -1699.54 | -43779.58  |
|            | 12:00 | 796.00  | 9351.39  | 108539.74  |
|            | 15:00 | 204.88  | -7389.06 | -209255.64 |
| 2016/12/07 | 10:00 | 154.11  | -564.04  | 75833.55   |
|            | 15:00 | 50.63   | 1598.44  | 20852.86   |
| 2016/12/08 | 11:00 | -15.89  | -739.04  | -25972.01  |
|            | 12:00 | 5.63    | -1411.63 | -22097.56  |
|            | 15:00 | -6.00   | -2081.94 | -29608.41  |
| 2016/12/10 | 10:00 | -5.50   | 6.25     | 26102.43   |
|            | 13:00 | 48.89   | -819.29  | -25127.53  |
|            | 15:00 | 54.44   | -1581.17 | -31700.53  |
| 2016/12/11 | 10:00 | -33.13  | 1348.44  | 32706.16   |
|            | 14:00 | -142.25 | 604.69   | 29583.33   |
| 2016/12/17 | 11:00 | 812.88  | 10113.64 | 126417.88  |
|            | 14:00 | -30.56  | -9371.45 | -216501.02 |
|            | 15:00 | -26.00  | 56.94    | 117854.94  |
| 2016/12/18 | 12:00 | 21.33   | 1373.15  | 29146.09   |
|            | 13:00 | 45.00   | -931.25  | -28819.44  |
|            | 15:00 | 455.13  | 5102.95  | 58767.60   |
| 2016/12/19 | 11:00 | -12.89  | -33.49   | 26850.14   |

|            |       |          |           |            |
|------------|-------|----------|-----------|------------|
|            | 14:00 | 25.00    | 1231.94   | 24191.74   |
|            | 15:00 | -9.38    | -1620.31  | -36994.36  |
| 2016/12/20 | 13:00 | 17.11    | 294.29    | 21273.36   |
|            | 15:00 | -39.78   | 741.36    | 22612.31   |
| 2016/12/21 | 11:00 | 8.88     | 1195.31   | 26499.57   |
| 2016/12/22 | 10:00 | 46.38    | 2667.19   | 41325.95   |
|            | 12:00 | 48.75    | 29.69     | -32968.75  |
|            | 15:00 | 31.13    | 918.23    | 23104.02   |
| 2016/12/23 | 10:00 | -74.38   | -1942.19  | -36048.18  |
|            | 12:00 | 5.63     | 1000.00   | 36777.34   |
| 2016/12/24 | 10:00 | 171.38   | 2067.19   | 29572.48   |
|            | 12:00 | -17.25   | -2357.81  | -55312.50  |
| 2016/12/30 | 09:00 | 17.67    | 387.96    | 30508.62   |
|            | 10:00 | 27.13    | -1229.69  | -26265.19  |
|            | 16:00 | -143.50  | -1822.92  | -21617.48  |
| 2016/12/31 | 12:00 | 19.75    | 2040.63   | 48294.27   |
| 2017/01/01 | 11:00 | -35.67   | -615.74   | -29515.17  |
| 2017/01/02 | 09:00 | -276.50  | -3384.38  | -46979.17  |
|            | 10:00 | 102.22   | 4208.02   | 84360.00   |
|            | 12:00 | 25.50    | -959.03   | -64588.16  |
|            | 15:00 | -31.50   | -2521.88  | -47673.61  |
| 2017/01/03 | 09:00 | -8.11    | 259.88    | 30908.35   |
|            | 13:00 | 27.50    | -1125.69  | -20762.92  |
|            | 15:00 | -263.13  | -4725.17  | -73129.10  |
| 2017/01/04 | 11:00 | -66.00   | 2464.06   | 89865.45   |
|            | 16:00 | 239.63   | 2785.59   | 34173.66   |
| 2017/01/05 | 11:00 | 59.50    | -2251.56  | -62964.41  |
|            | 14:00 | -794.56  | -9489.51  | -80421.60  |
| 2017/01/06 | 09:00 | -3052.13 | -28219.62 | -234126.40 |
|            | 11:00 | 1424.25  | 55954.69  | 1052178.82 |
|            | 14:00 | 2286.56  | 9581.17   | -515261.27 |
| 2017/01/07 | 11:00 | -36.00   | -29031.94 | -482663.97 |
| 2017/01/08 | 10:00 | -15.50   | 256.25    | 366102.43  |
|            | 12:00 | 205.89   | 2154.32   | 27200.79   |
|            | 13:00 | 75.25    | -1632.99  | -47341.34  |
|            | 15:00 | 13.11    | -1868.21  | -35410.67  |
| 2017/01/09 | 13:00 | 3.38     | -121.70   | 21831.36   |
|            | 15:00 | 80.50    | 1760.94   | 27539.06   |
| 2017/01/11 | 09:00 | 31.56    | -543.83   | -25608.50  |
|            | 10:00 | -125.75  | -3064.93  | -54310.86  |
|            | 12:00 | -31.38   | 4570.31   | 67771.27   |
| 2017/01/12 | 10:00 | 105.63   | 1712.50   | -35722.66  |
|            | 12:00 | -158.88  | -1903.99  | -21708.86  |
|            | 15:00 | -23.75   | 1689.06   | 44913.19   |

|            |       |          |           |            |
|------------|-------|----------|-----------|------------|
| 2017/01/14 | 09:00 | -18.13   | 1330.38   | 31759.02   |
| 2017/01/15 | 09:00 | -82.25   | -1462.85  | -23063.75  |
|            | 11:00 | -20.88   | 767.19    | 27875.43   |
|            | 14:00 | -12.50   | -656.25   | -26831.60  |
| 2017/01/16 | 09:00 | 42.13    | 1640.63   | 21516.93   |
|            | 11:00 | 10.56    | -350.77   | -22126.63  |
|            | 14:00 | 219.88   | 2616.49   | 37090.81   |
| 2017/01/17 | 09:00 | -137.63  | -4468.75  | -88565.54  |
|            | 14:00 | -5.33    | 1469.91   | 65985.08   |
| 2017/01/18 | 11:00 | 52.13    | 723.44    | 24229.60   |
|            | 14:00 | 6.13     | -2284.38  | -45305.99  |
|            | 16:00 | -529.89  | -5955.71  | -40792.61  |
| 2017/01/19 | 10:00 | -349.25  | 2257.99   | 102671.20  |
|            | 12:00 | -277.89  | -1073.77  | -35264.06  |
|            | 16:00 | -86.00   | 2398.61   | 43404.71   |
| 2017/01/20 | 10:00 | -85.00   | 12.50     | -29826.39  |
|            | 12:00 | -292.56  | -2306.17  | -25763.03  |
|            | 15:00 | -98.50   | 2425.69   | 59148.34   |
| 2017/01/21 | 10:00 | -41.13   | 717.19    | -21356.34  |
|            | 12:00 | -220.75  | -2500.00  | -30056.42  |
|            | 15:00 | -139.78  | 899.69    | 37774.35   |
| 2017/01/22 | 11:00 | -464.00  | -4052.78  | -61905.86  |
|            | 16:00 | -593.25  | -1615.63  | 30464.41   |
| 2017/01/23 | 11:00 | -333.11  | 2890.43   | 50067.30   |
|            | 14:00 | -870.63  | -6718.92  | -120116.95 |
|            | 16:00 | -716.63  | 1925.00   | 108049.05  |
| 2017/01/24 | 11:00 | -117.56  | 6656.33   | 52570.30   |
|            | 14:00 | -50.13   | 842.88    | -72668.07  |
| 2017/01/25 | 11:00 | -173.75  | -1806.25  | -20629.34  |
| 2017/01/26 | 11:00 | -83.33   | 1004.63   | 31232.00   |
|            | 14:00 | -135.25  | -648.96   | -20669.85  |
|            | 16:00 | -215.78  | 678.86    | 27213.01   |
| 2017/01/27 | 10:00 | -63.88   | 571.01    | 20825.86   |
|            | 13:00 | -56.63   | 714.06    | 21161.02   |
|            | 15:00 | 10.38    | 581.08    | 20386.53   |
|            | 16:00 | 199.67   | 2154.63   | 24582.69   |
| 2017/01/28 | 11:00 | 2796.38  | 32458.85  | 378802.81  |
|            | 13:00 | 1290.25  | -18826.56 | -641067.71 |
| 2017/01/29 | 09:00 | 506.44   | -8708.95  | 112417.91  |
|            | 11:00 | 159.13   | -4341.49  | 54593.22   |
|            | 14:00 | 149.00   | -126.56   | 52686.63   |
| 2017/01/31 | 13:00 | -930.38  | -11457.81 | -140588.11 |
|            | 15:00 | -2374.11 | -16041.51 | -50930.00  |
| 2017/02/01 | 16:00 | -1244.63 | 14118.58  | 377001.11  |

|            |       |          |           |            |
|------------|-------|----------|-----------|------------|
| 2017/02/02 | 11:00 | -1079.00 | 2070.31   | -150603.30 |
|            | 14:00 | -471.78  | 6746.91   | 51962.23   |
| 2017/02/03 | 10:00 | -239.63  | 2901.91   | -48062.55  |
|            | 11:00 | -138.88  | 1259.38   | -20531.68  |
|            | 13:00 | 1431.00  | 17842.75  | 223004.05  |
|            | 15:00 | 56.44    | -15272.84 | -367951.05 |
| 2017/02/04 | 10:00 | 88.38    | 399.13    | 195899.64  |
| 2017/02/07 | 10:00 | 25.67    | -993.98   | -24863.68  |
|            | 12:00 | -253.88  | -2596.88  | -21243.49  |
|            | 13:00 | -143.67  | 1224.54   | 42460.13   |
|            | 15:00 | 202.50   | 2732.81   | 31436.63   |
| 2017/02/08 | 13:00 | 100.22   | -1136.42  | -42991.47  |
|            | 15:00 | -64.50   | 1193.75   | 34782.99   |
| 2017/02/11 | 10:00 | -43.25   | -2039.06  | -37656.25  |
|            | 12:00 | -5.11    | 423.77    | 27364.75   |
|            | 13:00 | 230.00   | 2148.61   | 21998.46   |
|            | 15:00 | 252.38   | 279.69    | -23361.55  |
| 2017/02/12 | 10:00 | 31.78    | -3048.30  | -41335.31  |
|            | 12:00 | 26.75    | -62.85    | 37318.19   |
|            | 13:00 | 12.25    | -2205.21  | -47345.20  |
|            | 15:00 | 53.38    | 514.06    | 33990.89   |
| 2017/02/13 | 11:00 | 115.88   | -958.51   | -31311.97  |
|            | 14:00 | 203.50   | 2022.92   | 31426.50   |
| 2017/02/14 | 09:00 | 105.50   | -1225.00  | -40598.96  |
|            | 14:00 | 390.25   | 4260.07   | 61036.36   |
| 2017/02/15 | 11:00 | 88.88    | -3767.19  | -100340.71 |
| 2017/02/16 | 09:00 | 206.44   | 1306.33   | 56372.39   |
|            | 11:00 | 71.25    | -1679.69  | -20868.06  |
|            | 14:00 | 185.00   | 1743.06   | 25356.87   |
| 2017/02/17 | 11:00 | 30.25    | -1934.38  | -45967.88  |
| 2017/02/18 | 10:00 | 20.78    | -105.25   | 20323.65   |
|            | 12:00 | -76.44   | 1357.56   | 34806.24   |
|            | 16:00 | -232.00  | -2292.19  | -32999.13  |
| 2017/02/19 | 09:00 | -100.38  | 2682.81   | 45062.93   |
|            | 10:00 | -37.50   | 785.94    | -23710.94  |
|            | 12:00 | 246.00   | 2719.44   | 35268.13   |
| 2017/02/21 | 09:00 | 164.75   | -1015.63  | 32688.37   |
|            | 12:00 | -539.88  | -6135.94  | -85501.30  |
| 2017/02/22 | 09:00 | 39.88    | 0.00      | -29199.22  |
|            | 12:00 | 241.75   | 3262.15   | 29748.75   |
|            | 16:00 | -1115.38 | -12094.97 | -131513.07 |
